# Supplementary material for: Functional Identification of the Xanthomonas oryzae pv. oryzae Type I-C CRISPR-Cas System and Its Potential in Gene Editing Application
Source: Front Microbiol. 2021 Aug 12;12:686715. doi: 10.3389/fmicb.2021.686715 (PMC8406640; doi:10.3389/fmicb.2021.686715)
Supplement: Supplementary file 1 [file Table_1.DOCX]

**Table S1 Primers used in present study.**

| Primer name | Primer sequence (5'–3') | Use |
| --- | --- | --- |
| XooCas-F1 | gatcggaTCCTGCTCAAGGATGACTCGCGT | Complementation test |
| XooCas-R1 | gcatgaatTCAATCACTTGGAAATTTCGCGAG |
| XooCas-F2 | gatcgaattcTACTGACTTATGAGTAACGCAC |
| XooCas-R2 | ATCCGGGTGGTCGACAACGCTTC |
|  |  |  |
| Cas3-F1 | atgcggatccTACACAGAAAAATTTCAGGCACG | Cas gene deletion template |
| Cas3-R1 | GTTGACGATGCACAGCACTTGTGAAAGCCGCTCATGCAGAGATG |
| Cas3-F2 | ACAAGTGCTGTGCATCGTCAAC |
| Cas3-R2 | cgatgtcgacTTCGTCGTCCAGTAGGTTGTC |
| Cas5-F1 | atgcggatccTACTCGTCAGAAGTGATGTTATG |
| Cas5-R1 | AGGACACCCGCTCCACCTTCATTTC |
| Cas5-F2 | ATGAAGGTGGAGCGGGTGTCCTGCTGGATGCTGCACGACATCGAC |
| Cas5-R2 | gcatgtcgacTCCATCTTTCGATGAATGCCA |
| Csd1-F1 | atcgagatctGATGCTGCACGACATCGACTTC |
| Csd1-R1 | GCCAATCTTCTCCCGACTGTAG |
| Csd1-F2 | CTACAGTCGGGAGAAGATTGGCCTCGATACAGGCAATACCGATC |
| Csd1-R2 | gcatgtcgaCGACGTAGTTACGGATCTTGC |
| Csd2-F1 | agtcggatccATCCAGGAACAAGGCCGCTTC |
| Csd2-R1 | GATGACGTCGAACAGGTAGAC |
| Csd2-F2 | GTCTACCTGTTCGACGTCATCGCCGACTACCGGGTCACGATC |
| Csd2-R2 | gcatgtcgaCGCACAACTGGACCTCATCG |
| Cas4-F1 | atgcggatccGCCGACTACCGGGTCACGATC |
| Cas4-R1 | CCACTGCTGCTCCACATGGATTAG |
| Cas4-F2 | CTAATCCATGTGGAGCAGCAGTGGAGCGTtGACCAGTGGGTCCGC |
| Cas4-R2 | gcatgtcgacGAGCCGCTTCAAAGAGTGCTG |

| Primer name | Primer sequence (5'–3') | Use |
| --- | --- | --- |
| Cas1/2-F1 | gatcggatccATGCTGCACGACAGCGACACG | Cas gene deletion template |
| Cas1/2-R1 | GGCATACAGTGTGTTGAGTTG |
| Cas1/2-F2 | CAACTCAACACACTGTATGCCGTAGAGCACGTCGGTGCCAAG |
| Cas1/2-R2 | gcatctcgagACCCCGCCAGCATAAGTGCTTG |
|  |  |  |
| cSpe-F1 | aaacGCGCTTAGCTGGATAACGCCACGGAATGATGTCG | gRNA annealing |
| cSpe-R1 | cgacCGACATCATTCCGTGGCGTTATCCAGCTAAGCGC |
| cSpe-F2 | aaacGAGATGGCGCTCGATGACGCCAACTACCTCTGAT |
| cSpe-R2 | cgacATCAGAGGTAGTTGGCGTCATCGAGCGCCATCTC |
| cXopQ-F1 | aaacGATCGCCTGGCATTGCCGGATGTGCGCGTCGCGC |
| cXopQ-R1 | cgacGCGCGACGCGCACATCCGGCAATGCCAGGCGATC |
| cXopQ-F2 | aaacTCGCCTGGCATTGCCGGATGTGCGCGTCGCGC |
| cXopQ-R2 | cgacGCGCGACGCGCACATCCGGCAATGCCAGGCGA |
| cXopQ-F3 | aaacGATCGCCTGGCATTGCCGGATGTGCGCGT |
| cXopQ-R3 | cgacACGCGCACATCCGGCAATGCCAGGCGATC |
| cXopQ-F6 | aaacGATCGCCTGGCATTGCCGGATGTGCGC |
| cXopQ-R6 | cgacGCGCACATCCGGCAATGCCAGGCGATC |
| cXopQ-F7 | aaacGATCGCCTGGCATTGCCGGATGTGC |
| cXopQ-R7 | cgacGCACATCCGGCAATGCCAGGCGATC |
| cXopQ-F4 | aaacGATCGCCTGGCATTGCCGGATGTG |
| cXopQ-R4 | CACATCCGGCAATGCCAGGCGATC |
| cXopQ-F5 | aaacGATCGCCTGGCATTGCCGG |
| cXopQ-R5 | CCGGCAATGCCAGGCGATC |
| cKan-F1 | aaacCTTGCGCAGCTGTGCTCGACGTTGTCACTGAAGC |
| cKan-R1 | cgacGCTTCAGTGACAACGTCGAGCACAGCTGCGCAAG |
